# Supplementary material for: Transgenic Mouse Models to Study the Development and Maintenance of the Adrenal Cortex
Source: MDPI journal article supplement (doi:10.3390/ijms232214388), 2022-11-19
Supplement: s1 [file s1]

**Table S1:** Adrenocortical expression and limitations of Cre mouse strains available to study adrenal cortex development and maintenance

| Mouse strains                      | Expression in the adrenal gland          | Recombination                                               | Usage                                                                  | Limitations*                                                                                                                                                                                                                                                                                                                                                                                                                                                                          |
|------------------------------------|------------------------------------------|-------------------------------------------------------------|------------------------------------------------------------------------|---------------------------------------------------------------------------------------------------------------------------------------------------------------------------------------------------------------------------------------------------------------------------------------------------------------------------------------------------------------------------------------------------------------------------------------------------------------------------------------|
| <i>CAG-CreER</i>                   | - Expression in all cells of the adrenal | - Tamoxifen injection dependent                             | - Varying (depending on the cell type expressing the gene of interest) | <ul style="list-style-type: none"> <li>- Timing of tamoxifen injection should be carefully selected</li> <li>- Global gene inactivation: Potential indirect effect on the adrenal, might lead to rapid embryonic death if used to study development</li> </ul>                                                                                                                                                                                                                        |
| <i>Osr1<sup>eGFP-CreERt2</sup></i> | - Coelomic Epithelium                    | - Tamoxifen injection dependent (injection of dams at e8.5) | - Study of coelomic epithelium and early stages of AGP development     | <ul style="list-style-type: none"> <li>- Timing of tamoxifen injection should be carefully selected (<i>Osr1</i> is not expressed in the AGP/AP)</li> <li>- Variable efficiency, might need to use this strain in combination with the <i>Wt1<sup>CreERt2/+</sup></i> strain</li> <li>- Expressed in intermediate and dorsal lateral plate mesoderms and their descendants (heart, kidney, gonad, muscle connective tissue, fibro-adipogenic progenitors)</li> </ul>                  |
| <i>Wt1<sup>CreERt2/+</sup></i>     | - Coelomic epithelium/AGP                | - Tamoxifen injection dependent (injection of dams at e8.5) | - Study of coelomic epithelium and early stages of AGP development     | <ul style="list-style-type: none"> <li>- Timing of tamoxifen injection should be carefully selected (<i>Wt1</i> is not expressed in the AP)</li> <li>- Variable efficiency, might need to use this strain in combination with the <i>Osr1<sup>eGFP-CreERt2</sup></i> strain to study coelomic epithelium development</li> <li>- Expressed in intermediate mesoderm and its descendants (heart, kidney, wolffian duct, gonads...) both in the embryos and postnatally. Also</li> </ul> |



|                                                                                                                          |                                                                                                                   | in the fetal cortex only)                                                                  |                                                                                                                                                                                                 |                                                                                                                                                                                                                                                                                                                                                                                                                                                                         |
|--------------------------------------------------------------------------------------------------------------------------|-------------------------------------------------------------------------------------------------------------------|--------------------------------------------------------------------------------------------|-------------------------------------------------------------------------------------------------------------------------------------------------------------------------------------------------|-------------------------------------------------------------------------------------------------------------------------------------------------------------------------------------------------------------------------------------------------------------------------------------------------------------------------------------------------------------------------------------------------------------------------------------------------------------------------|
| <p><i>Nr5a1-Cre<sup>high</sup></i> (from Keith Parker lab)</p> <p>and</p> <p><i>Nr5a1-Cre</i> (from Bradford Lowell)</p> | - AGP/AP, fetal adrenal cortex, definitive adrenal cortex (including subcapsular progenitor cells)                | -e10.5 (exact recombination onset has not been evaluated for the strain from Lowell group) | <p>- Most used models, best characterized models</p> <p>- Study of the development of the fetal cortex and development/maintenance/function of the definitive cortex</p>                        | <p>- Expressed in the gonads (Leydig/Sertoli/Theca/Granulosa), gonadotropes of the pituitary, VMH, subpopulation of dermal fibroblast progenitor, spleen</p> <p>- Potential indirect effect of sex hormones due to the inactivation of the targeted genes in testis/ovary/pituitary; Should measure circulating testosterone, oestrogen, LH and FSH levels</p> <p>- Inactivation of the targeted gene in the VMH could affect corticosterone/ACTH diurnal feedback.</p> |
| <i>Nr5a1-Cre<sup>low</sup></i> (from Keith Parker lab)                                                                   | - Same as <i>Nr5a1-Cre<sup>high</sup></i> but in fewer cells                                                      | -e10.5                                                                                     | - Interesting to evaluate gain-of-function mutation in proto-oncogene or mutation in tumor suppressor genes (more representative of tumor formation. i.e clonal expansion of few mutated cells) | - Not as useful to study the development of the fetal cortex (recombination in fewer cells)                                                                                                                                                                                                                                                                                                                                                                             |
| <i>Nr5a1<sup>eGFP-CreERT2</sup></i><br><b>(not characterized in the adrenal gland, expected results)</b>                 | - Potentially AGP/AP, fetal adrenal cortex, definitive adrenal cortex (including subcapsular progenitor cells)    | - Tamoxifen injection dependent                                                            | - Study of the development of the fetal cortex and development/maintenance/function of the definitive cortex                                                                                    | - Similar limitations to the postnatal characterization of <i>Nr5a1-Cre</i> models                                                                                                                                                                                                                                                                                                                                                                                      |
| <p><i>hCyp11a1-iCre</i></p> <p><i>mCyp11a1-iCre</i></p>                                                                  | - Adrenal gland cortex (fetal and definitive), Expression should be limited to steroidogenic cells (expression at | - <i>hCyp11a1-iCre</i> (e10.5)                                                             | - Study of the development of the fetal cortex and development/maintenance/function of the definitive cortex                                                                                    | - Expressed in fetal and adult Leydig cells, theca cells and corpus luteum of the postnatal ovaries, brain ( <i>hCyp11a1-iCre</i> and <i>Cyp11a1<sup>Gfp,Cre/+</sup></i> ; not evaluated                                                                                                                                                                                                                                                                                |

|                                                                      |                                                                                                                    |                                                                                                                                                                                                                   |                                                                                                                                                                                                                                                                                               |                                                                                                                                                                                                                                                                                                           |
|----------------------------------------------------------------------|--------------------------------------------------------------------------------------------------------------------|-------------------------------------------------------------------------------------------------------------------------------------------------------------------------------------------------------------------|-----------------------------------------------------------------------------------------------------------------------------------------------------------------------------------------------------------------------------------------------------------------------------------------------|-----------------------------------------------------------------------------------------------------------------------------------------------------------------------------------------------------------------------------------------------------------------------------------------------------------|
| <i>Cyp11a1<sup>Gfp,Cre/+</sup></i>                                   | e10.5 in the <i>hCyp11a1-iCre</i> suggests it might not be the case)                                               | <ul style="list-style-type: none"> <li>- <i>mCyp11a1-iCre</i> (not evaluated before e14.5)</li> <li>- <i>Cyp11a1<sup>Gfp,Cre/+</sup></i> (not evaluated before e17.5)</li> </ul>                                  |                                                                                                                                                                                                                                                                                               | <p>in <i>mCyp11a1-iCre</i>), fetal ovaries (<i>hCyp11a1-iCre</i>)</p> <ul style="list-style-type: none"> <li>- Potential indirect effect of sex hormones due to the inactivation of the targeted genes in testis/ovary. Should measure circulating testosterone, oestrogen, LH and FSH levels.</li> </ul> |
| <i>Akr1b7-Cre</i>                                                    | - Steroidogenic cells of the fetal and definitive adrenal cortex                                                   | <ul style="list-style-type: none"> <li>- e14.5 (stochastic recombination, 80% the cells)</li> <li>- Not expressed in fetal adrenocortical cells that differentiate into cells of the definitive cortex</li> </ul> | <ul style="list-style-type: none"> <li>- Useful to study function of the definitive adrenal cortex (independently of the fetal cortex)</li> <li>- Expression is more specific than <i>Nr5a1-Cre</i> and <i>Cyp11a1-Cre</i></li> </ul>                                                         | <ul style="list-style-type: none"> <li>- Expressed in the kidney (developing and adult)</li> <li>- Recombination less efficient than <i>Nr5a1-Cre/ Cyp11a1-Cre</i> strains (but more specific)</li> </ul>                                                                                                 |
| <i>Cyp11b2<sup>Cre</sup></i>                                         | - Steroidogenic zG cells and their descendants (zF cells)                                                          | <ul style="list-style-type: none"> <li>- Rare cells from e16.5 to 1dpp (all zG cells at 6 weeks)</li> <li>- Recombination in all zF cells at 3 months in females and approximately 9 months in male</li> </ul>    | <ul style="list-style-type: none"> <li>- Best model to study zG morphogenesis and functions (no recombination in fetal/definitive cortex before zG formation)</li> <li>- Useful to study zG to zF centripetal transdifferentiation/adrenal maintenance and perform tracing studies</li> </ul> | <ul style="list-style-type: none"> <li>- Mosaic of recombined and not recombined zG cells (rapid transdifferentiation of stem and progenitor cells population to restore zG functions)</li> <li>- zF cell maintenance can become independent of zG cell transdifferentiation in some models</li> </ul>    |
| <i>Cyp11b1<sup>eGFP-Cre</sup></i> ( <b>not fully characterized</b> ) | - zF cells (double marking/higher magnification images needed to determine if some zG cells are recombined or not) | - Unknown (not evaluated in the embryo)                                                                                                                                                                           | - Potentially useful to study maintenance/functions of the zF.                                                                                                                                                                                                                                | - Model not well characterized (expression in the fetal adrenal cortex, and potential expression in the fetal gonads not evaluated), only one article published in Chinese                                                                                                                                |
| <i>Gli1<sup>CreERT2</sup></i>                                        | - Subpopulation of capsular (stem cells) (and their descendants)                                                   | - Tamoxifen injection dependent                                                                                                                                                                                   | <ul style="list-style-type: none"> <li>- Useful to target capsular stem cells</li> <li>- Study of adrenal cortex maintenance</li> </ul>                                                                                                                                                       | - Expressed in kidney, brain, astrocytes, fibroblast, chondrocytes, adipocytes, hair follicle, prostate, perisoteal cells, Leydig cell, theca cells...                                                                                                                                                    |

|                                                                        |                                                                                                                                                                                         |                                 |                                                                                      |                                                                                                                                                                                                                                                                                             |
|------------------------------------------------------------------------|-----------------------------------------------------------------------------------------------------------------------------------------------------------------------------------------|---------------------------------|--------------------------------------------------------------------------------------|---------------------------------------------------------------------------------------------------------------------------------------------------------------------------------------------------------------------------------------------------------------------------------------------|
|                                                                        |                                                                                                                                                                                         |                                 | - Tracing experiment to study centripetal transdifferentiation                       | <p>- Capsular stem cells do not normally contribute to adrenal maintenance in adult males</p> <p>- Potential indirect effect of sex hormones due to inactivation of the targeted genes in Leydig and theca cells. Should measure circulating testosterone, oestrogen, LH and FSH levels</p> |
| <i>Shh<sup>Cre</sup></i>                                               | - Cortex periphery in the forming definitive cortex, subcapsular progenitor cells of the zG (and their descendants)                                                                     | -e11.5                          | -Tracing experiment of progenitor cells                                              | - Expressed in developing limb buds, heart, ventral neural tube, lung epithelium, stomach endoderm, intestinal epithelium, external genitalia, neurons, prostate, secondary heart field...                                                                                                  |
| <i>Shh<sup>CreERT2</sup></i>                                           | - Subcapsular progenitor cells of the definitive cortex in the zG (and their descendants)                                                                                               | -Tamoxifen injection dependent  | - Mostly used for tracing experiment of progenitor cells                             | - Expressed in bladder epithelial stem cells, papillary collecting duct, uritheric epithelium, hair follicle, brain astrocytes, epithelial taste bud progenitors, spleen, gastric parietal cells...                                                                                         |
| <i>Axin2<sup>CreERT2</sup></i><br>and<br><i>Wnt4<sup>CreERT2</sup></i> | <p>- Cortex periphery in the forming definitive cortex (and their descendants)</p> <p>- Postnatally, Adrenal zG cells (including the subcapsular progenitors and their descendants)</p> | - Tamoxifen injection dependent | - Mostly used for tracing experiment of zG cells (including subcapsular progenitors) | <p>- Expressed in intestinal epithelium stem cells, mammary gland, neural stem cells, ovaries, liver, kidney... (<i>Axin2</i>)</p> <p>-Expressed in kidney, oesophagus, ovary, skin, small intestine... (<i>Wnt4</i>)</p>                                                                   |
| <i>Nes-CreERT2</i>                                                     | - Stress induced progenitor cell populations of                                                                                                                                         | - Tamoxifen injection dependent | - Tracing and purification of stress-induced progenitor cells                        | - Expressed in glial progenitor cells, astrocytes, oligodendrocytes                                                                                                                                                                                                                         |

|  |                                                                                           |  |                                   |                                                                                                     |
|--|-------------------------------------------------------------------------------------------|--|-----------------------------------|-----------------------------------------------------------------------------------------------------|
|  | steroidogenic cells of the adrenal cortex and of chromaffin cells (and their descendants) |  | - Evaluation of stress adaptation | - Should consider the contribution of other adrenocortical stem/progenitor cells to stress response |
|--|-------------------------------------------------------------------------------------------|--|-----------------------------------|-----------------------------------------------------------------------------------------------------|

\* Postnatal phenotypes should be evaluated in males and females as the adrenal cortex is sexually dimorphic
